# Supplementary material for: Modulation of Mycobacterium tuberculosis-specific humoral immune responses is associated with Strongyloides stercoralis co-infection
Source: PubMed Central journal article supplement (PMC5426788; doi:10.1371/journal.pntd.0005569), 2017-05-01

S. Figure. 1

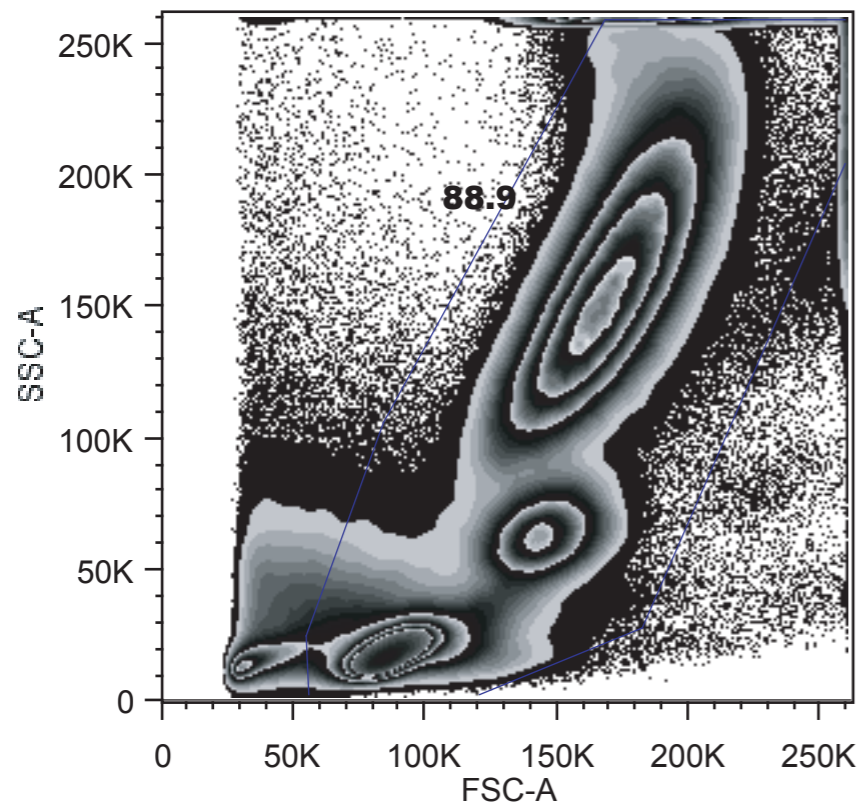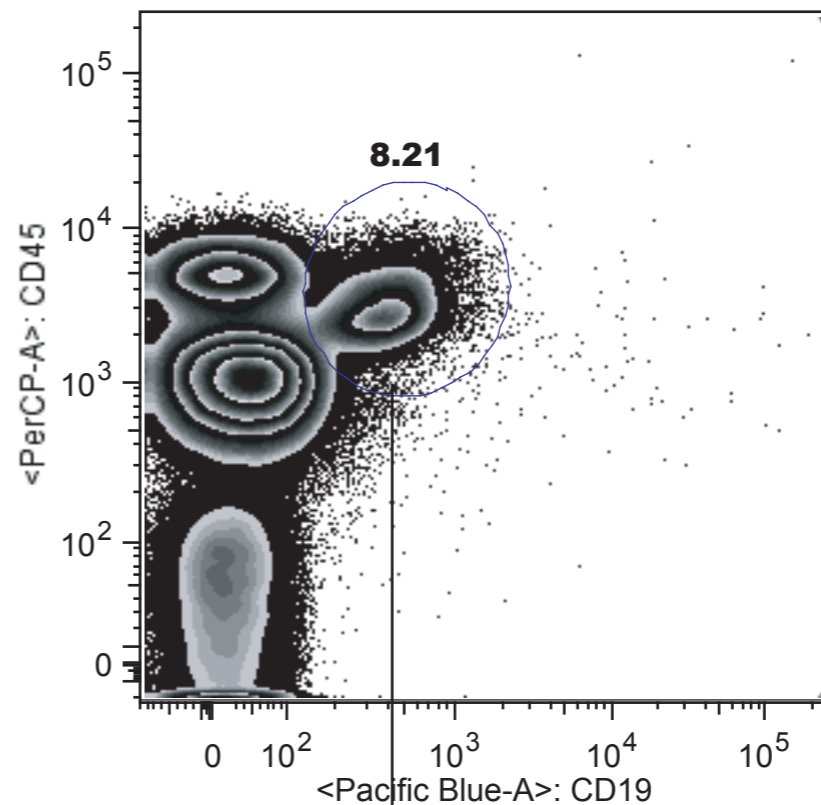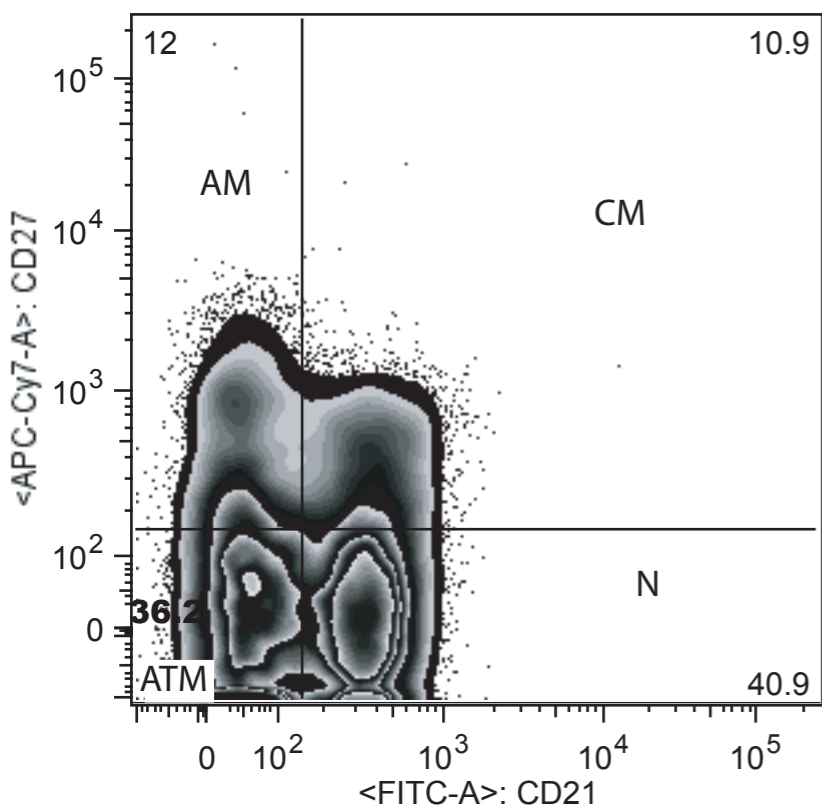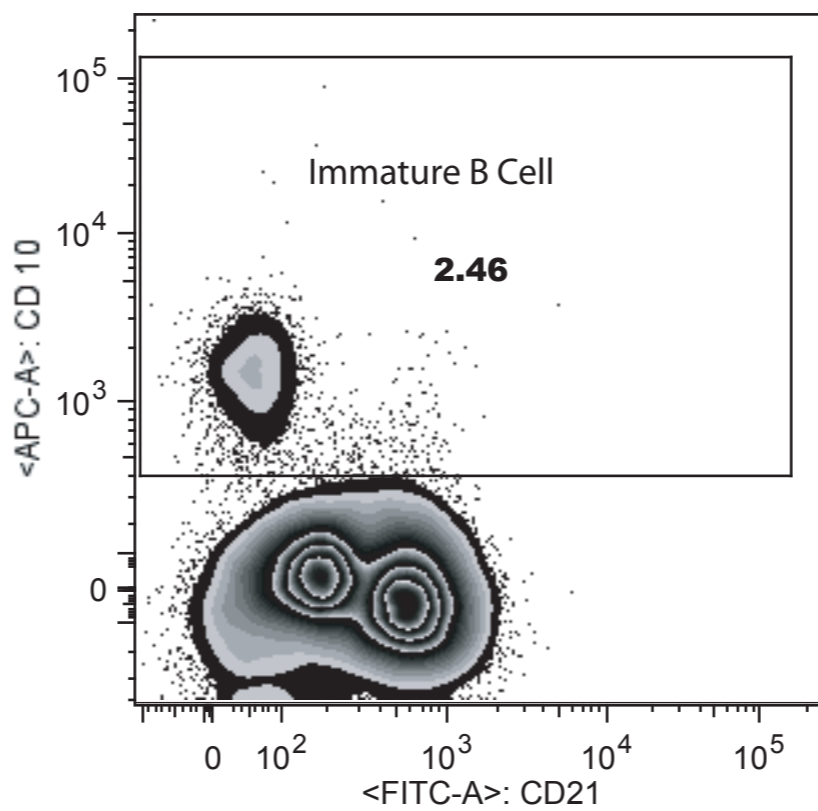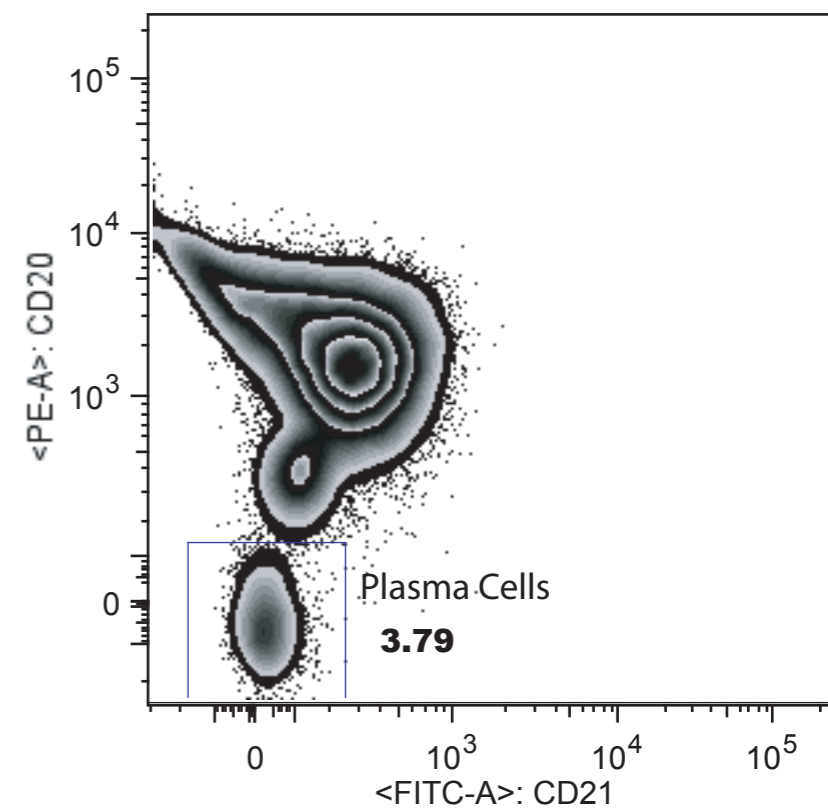

Supplement: pntd.0005569.s001.pdf [file pntd.0005569.s001.pdf]
